# Supplementary material
Source: publisher figshare collection journal article supplement (https://gsajournals.figshare.com/articles/dataset/_/7667078)
Supplement: Supplementary file 1 [file 1]

**Table S1      Candidate kinase Screen, alleles and deficiencies used in the screen****Protein kinase C family**

| Name                                      | CG number | location | allele / deficiency                       | described role    |
|-------------------------------------------|-----------|----------|-------------------------------------------|-------------------|
| atypical protein kinase C (aPKC)          | CG42783   | 51D5     | <i>aPKC</i> <sup>k06403</sup> BL10622     | cell polarity     |
| Inactivation no afterpotential C (inaC)   | CG6518    | 53E1     | Df(2R)Exel6065                            | phototransduction |
| Protein C kinase 53E (PKC53E)             | CG6622    | 53E2     | Df(2R)Exel6065                            | neural processing |
| Protein kinase C $\delta$ (Pkc $\delta$ ) | CG42349   | 11A10-11 | <i>Pkcdelta</i> <sup>e04408</sup> BL18258 | none              |

**Ca<sup>2+</sup>/calmodulin dependent protein kinase family (CAMK)**

| Name                                                           | CG number | location   | allele / deficiency                        | described role               |
|----------------------------------------------------------------|-----------|------------|--------------------------------------------|------------------------------|
| AMP-activated protein kinase $\alpha$ subunit (AMPK $\alpha$ ) | CG3501    | 2A1        | Df(1)Exel6227                              | energy balance               |
| Death associated protein kinase related (Drak)                 | CG32666   | 10C1-10C5  | <i>Drak</i> <sup>BG00876</sup>             | actomyosin contractility     |
| loki (lok)                                                     | CG10895   | 38B2       | Df(2L)Exel7077                             | DNA damage response          |
| MAP kinase activated protein-kinase-2 (MK2)                    | CG3086    | 5B8        | Df(1)Exel6236                              | chronic stress protection    |
| par-1 (par-1)                                                  | CG8201    | 56D9-56D11 | <i>par-1</i> <sup>k06323</sup> BL10615     | cell polarity                |
| spaghetti-squash activator (sqa)                               | CG42347   | 46B1       | <i>sqa</i> <sup>f01512</sup> BL18446       | starvation induced autophagy |
| Stretchin-Mlck (Strn-MLCK)                                     | CG44162   | 52D4-52D9  | <i>Strn-Mlck</i> <sup>c02860</sup> BL11089 | cytoskeletal dynamics        |
